# Supplementary material for: FoxO6-mediated ApoC3 upregulation promotes hepatic steatosis and hyperlipidemia in aged rats fed a high-fat diet
Source: publisher site journal article supplement (doi:10.18632/aging.205610), 2024-03-03
Supplement: Supplementary file [file aging-v16i5-205610-supplementary-material-SD1.pdf]

SUPPLEMENTARY FIGURES

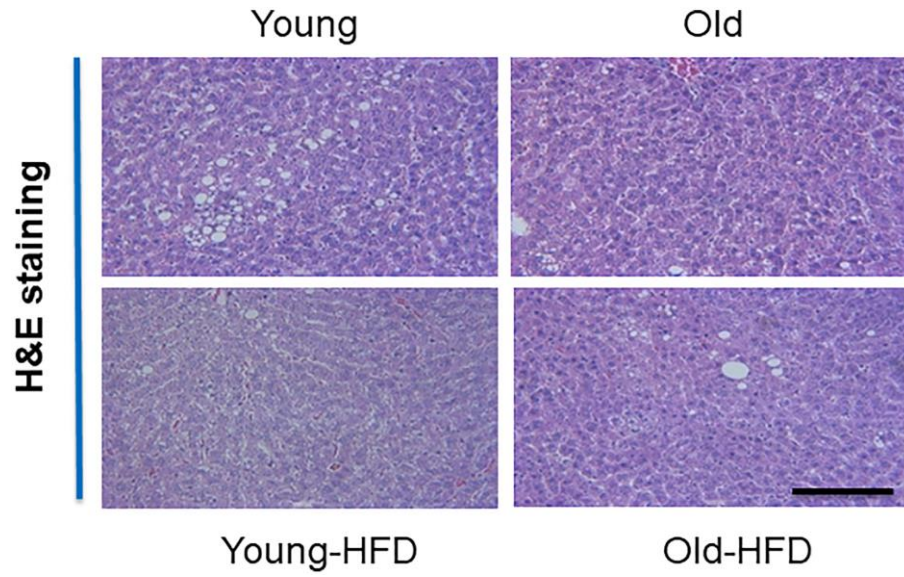

**Supplementary Figure 1. HFD feeding induced liver damage in aged rats.** Representative H&E staining shows increased vacuoles in liver tubules during aging. Scale bar: 100  $\mu$ m.

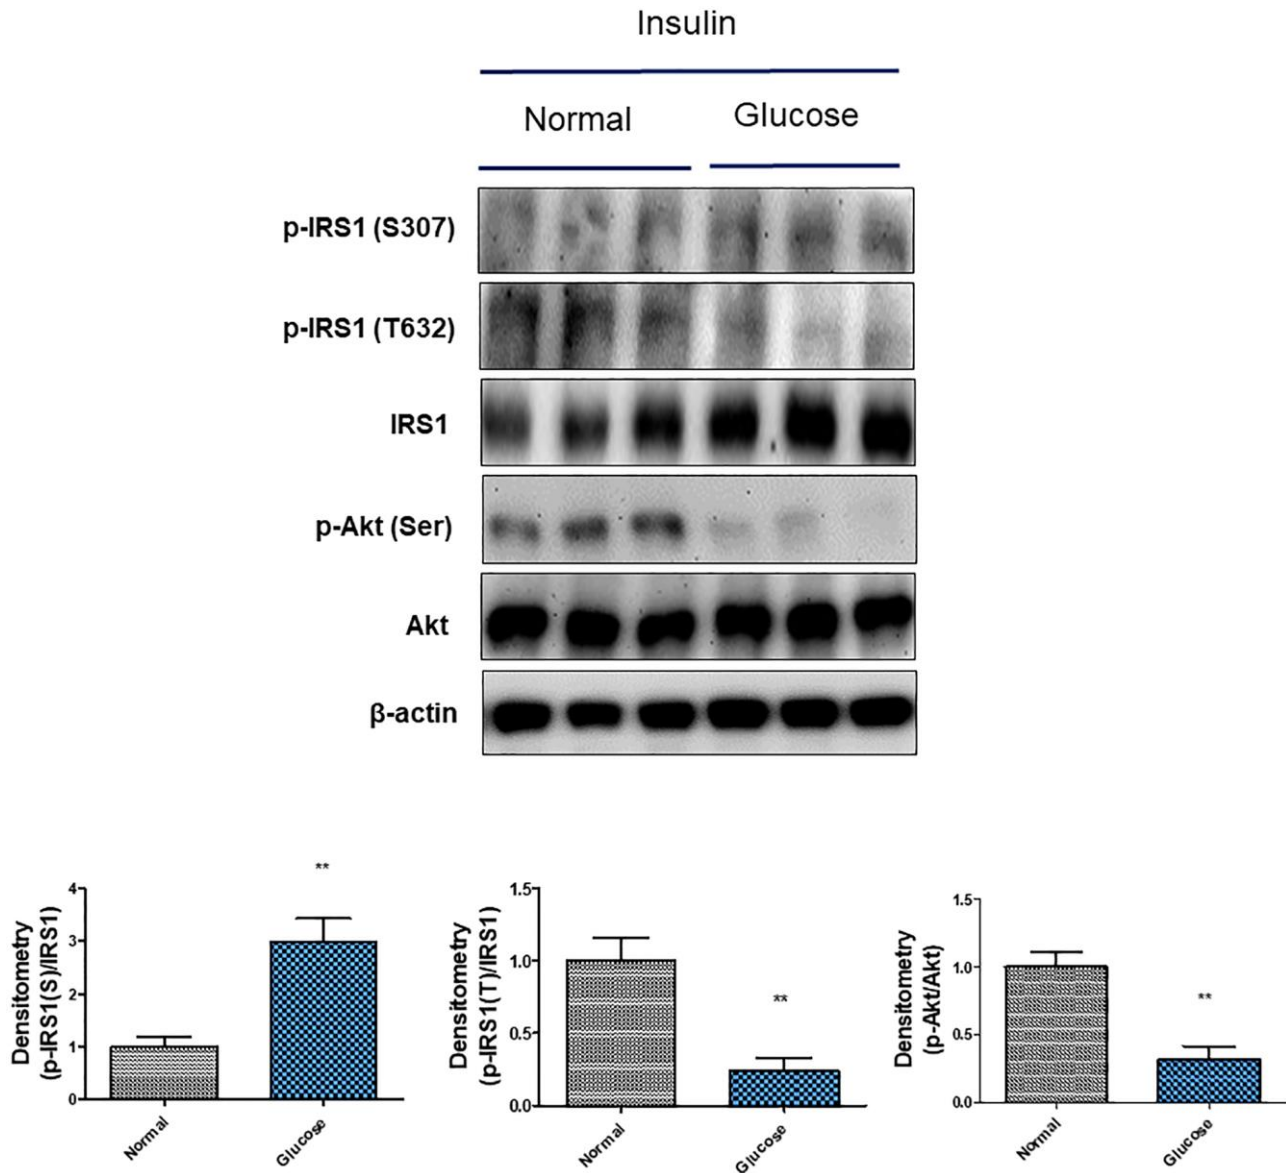

**Supplementary Figure 2. High-glucose suppressed the insulin signaling.** Western blotting was used to detect p-IRS1 (Ser307), p-IRS1 (Tyr632), IRS1, p-Akt (Ser473), and Akt in the cytosolic fraction (20 μg protein) after treatment of AC2F cells with glucose (25 mM) for 1 h. β-actin was the loading control of the cytosolic fractions. Results are representative of three independent experiments. Bars in densitometry data represent means ± S.E., and significance was determined using one-factor ANOVA: \*\* $p < 0.01$  vs. Normal.

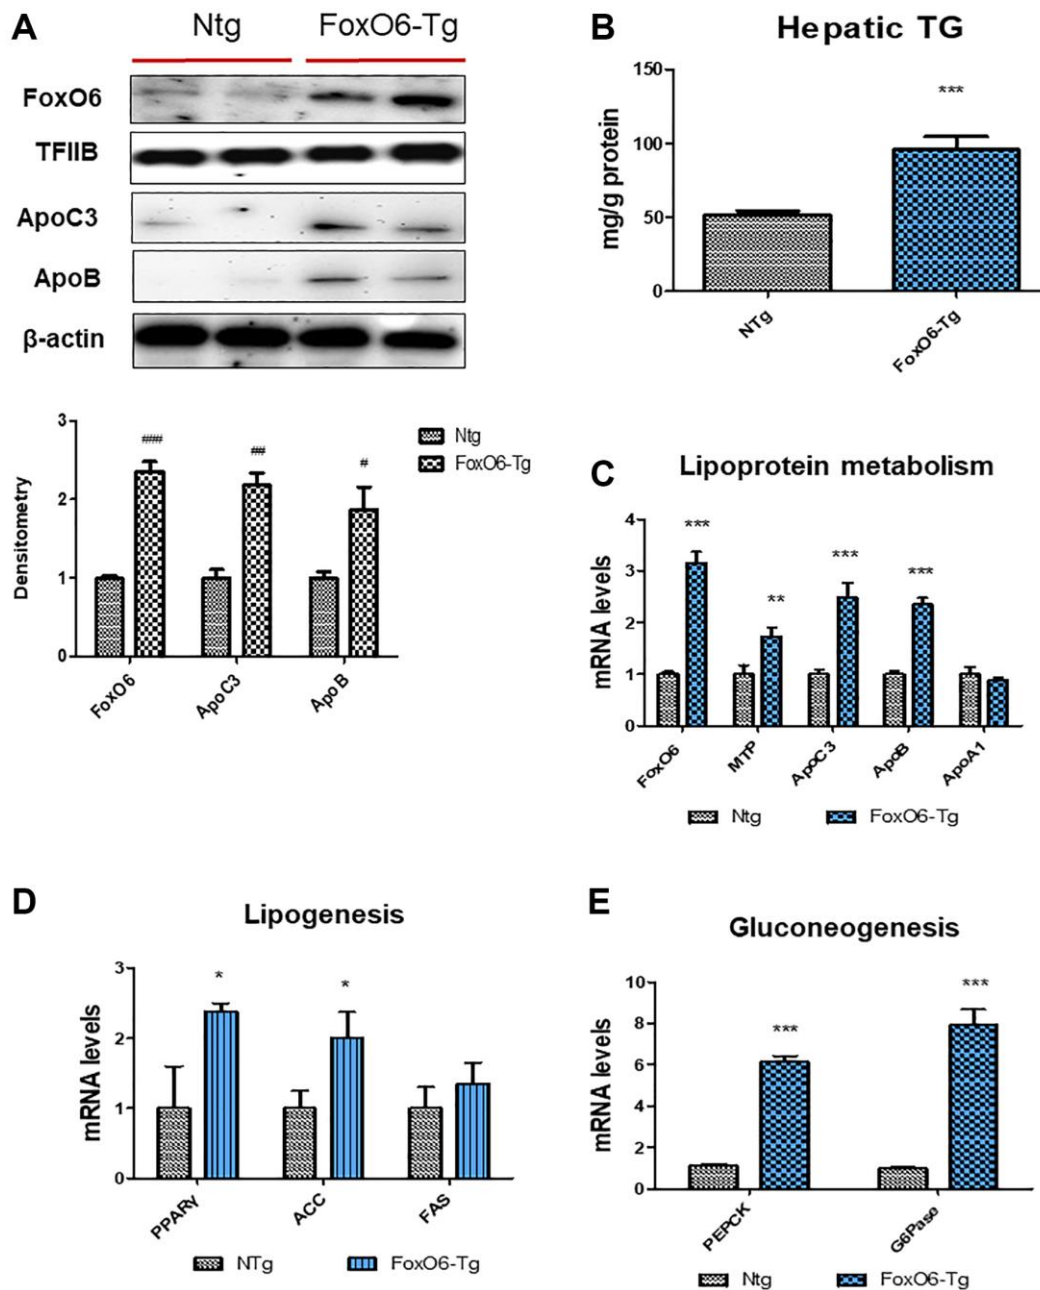

**Supplementary Figure 3. Regulation of the hepatic lipid accumulation in FoxO6-Tg mice.** (A) Western blotting was performed to examine the protein levels of FoxO6, ApoC3, and ApoB in the livers of FoxO6-Tg mice. TFIIIB was the loading control of the nuclear fractions, whereas  $\beta$ -actin was the loading control of the cytosolic fractions. Bars in the densitometry data represent the mean  $\pm$  S.E., and significance was determined using one-factor ANOVA: # $p < 0.05$ , ## $p < 0.01$ , ### $p < 0.001$  vs. Ntg. (B) Hepatic TG in FoxO6-Tg mice. Results of one-factor ANOVA \*\*\* $p < 0.001$  vs. WT littermates. (C) Real-time PCR analyses were performed for measuring the mRNA levels of FoxO6, MTP, ApoC3, ApoB, and ApoA1. Results of one-factor ANOVA: \*\* $p < 0.01$ , \*\*\* $p < 0.001$  vs. WT littermates. (D) Real-time PCR analyses were performed for measuring the mRNA levels of PPAR $\gamma$ , ACC, and FAS. Results of one-factor ANOVA: \* $p < 0.05$  vs. WT littermates. (E) Real-time PCR analyses were performed for measuring the mRNA levels of PEPCK and G6Pase. Results of one-factor ANOVA: \* $p < 0.05$ , \*\* $p < 0.01$  vs. WT littermates.
